# Supplementary material for: Poly(butylene succinate-co-ε-caprolactone) Copolyesters: Enzymatic Synthesis in Bulk and Thermal Properties
Source: MDPI journal article supplement (doi:10.3390/polym13162679), 2021-08-11
Supplement: s1 [file s1]

Supplementary Information

# Poly(butylene succinate-co- $\epsilon$ -caprolactone) Copolyesters: Enzymatic Synthesis in Bulk and Thermal Properties

María Núñez, Sebastián Muñoz-Guerra and Antxon Martínez de Ilarduya \*

Departament d'Enginyeria Química, Universitat Politècnica de Catalunya, ETSEIB, Diagonal 647, 08028 Barcelona, Spain; maria.nunez.gallego@gmail.com (M.N.); sebastian.munoz@upc.edu (S.M.-G.)

\* Correspondence: antxon.martinez.de.ilarduya@upc.edu

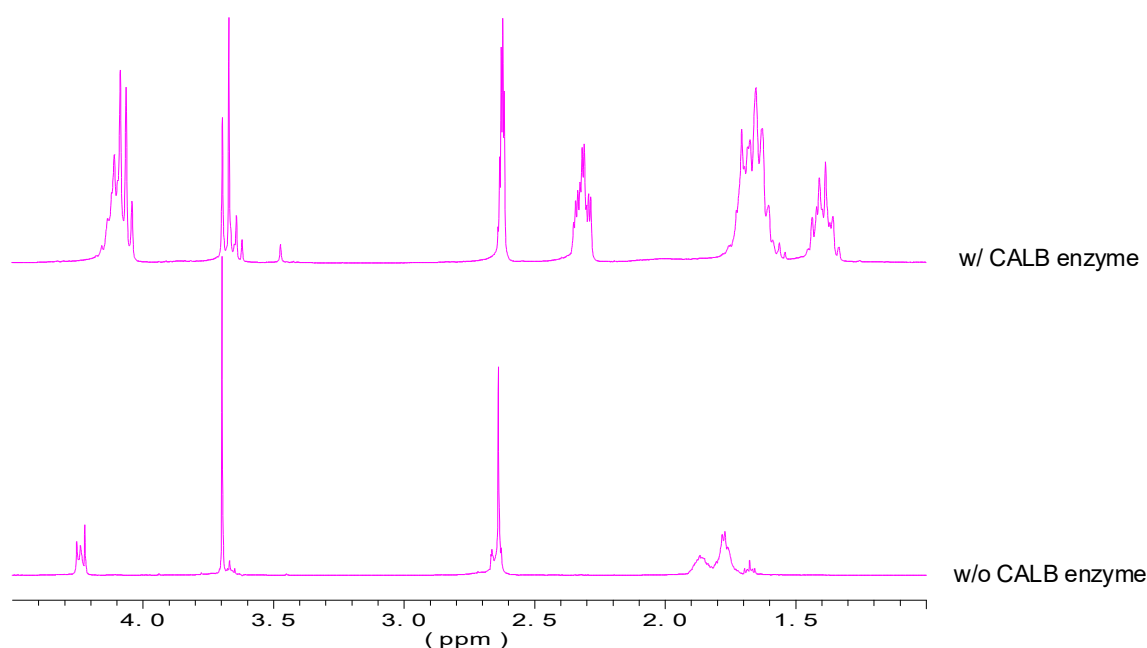

**Figure S1.**  $^1\text{H}$  NMR spectra of the reaction of BD with CL and DMS at 90 °C for 24 hours in the presence (top) or absence (bottom) of CALB enzyme. No vacuum was applied in the two cases.

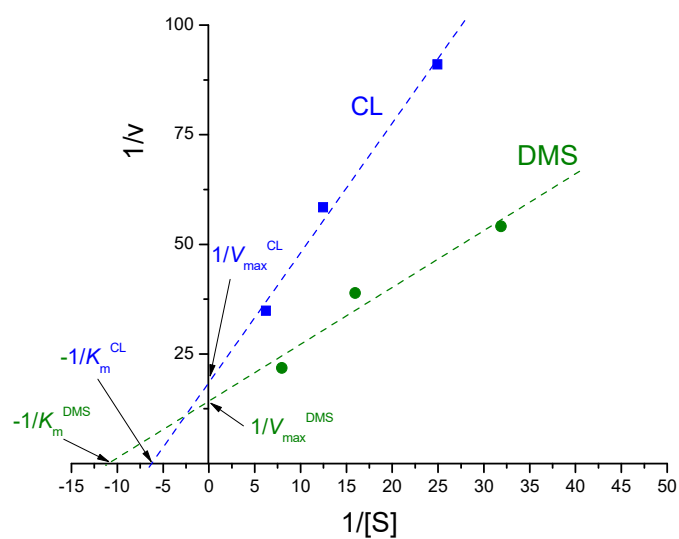

**Figure S2.** Lineweaver-Burk plot ( $1/V$  versus  $1/[S]$ ) for the determination of  $K_m$  and  $V_{max}$  for the reaction of benzyl alcohol with caprolactone (CL) or dimethyl succinate (DMS) in the presence of CALB enzyme.

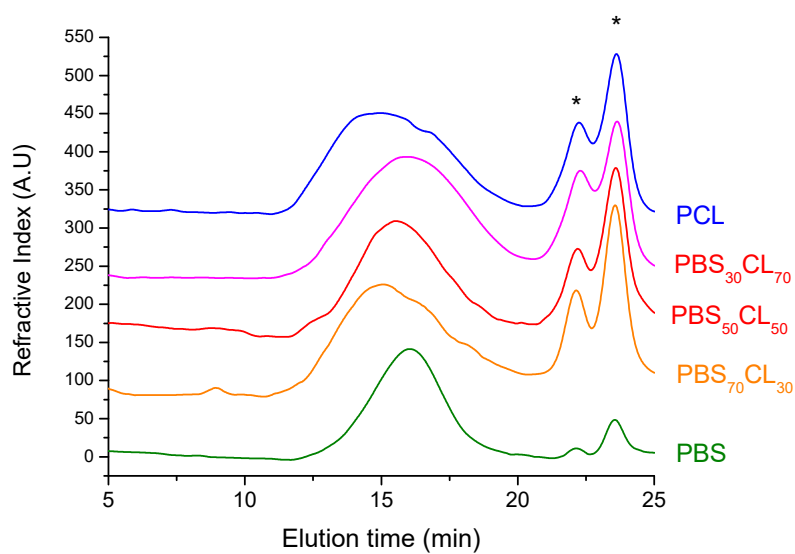

**Figure S3.** GPC chromatograms of PBS, PCL and  $PBS_xCL_y$  copolyesters recorded at 35 °C using HFIP as eluent. (\*) peaks of sodium trifluoroacetate salt and impurity solvents.

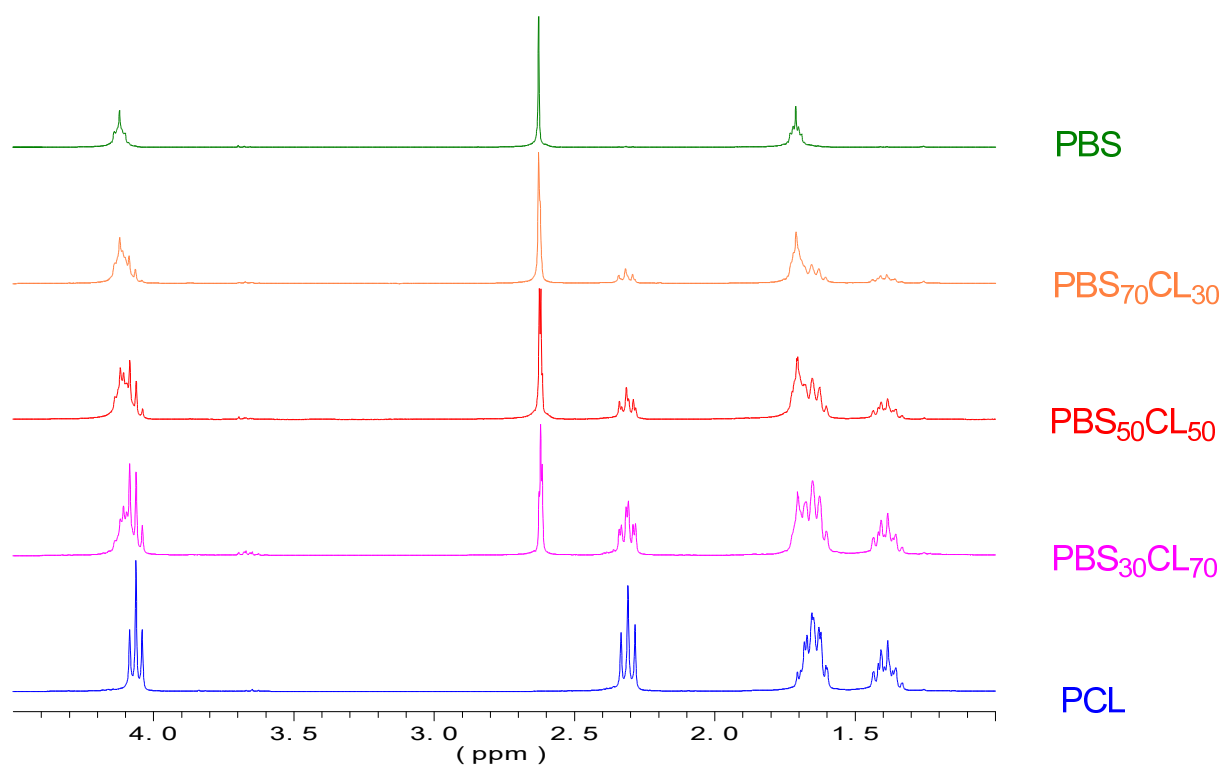

**Figure S4.**  $^1\text{H}$  NMR spectra of PBS,  $\text{PBS}_x\text{CL}_y$  and PCL recorded in  $\text{CDCl}_3$  with peak assignments.

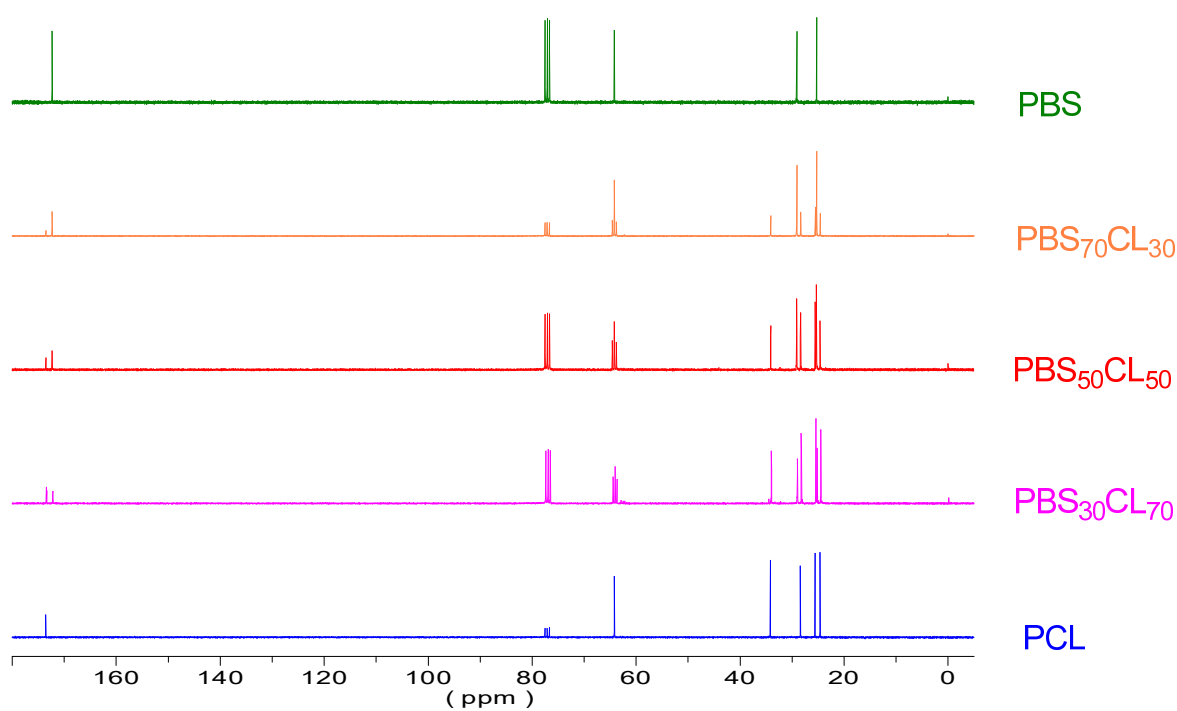

**Figure S5.**  $^{13}\text{C}$  NMR spectra of PBS,  $\text{PBS}_x\text{CL}_y$  and PCL recorded in  $\text{CDCl}_3$  with peak assignments.

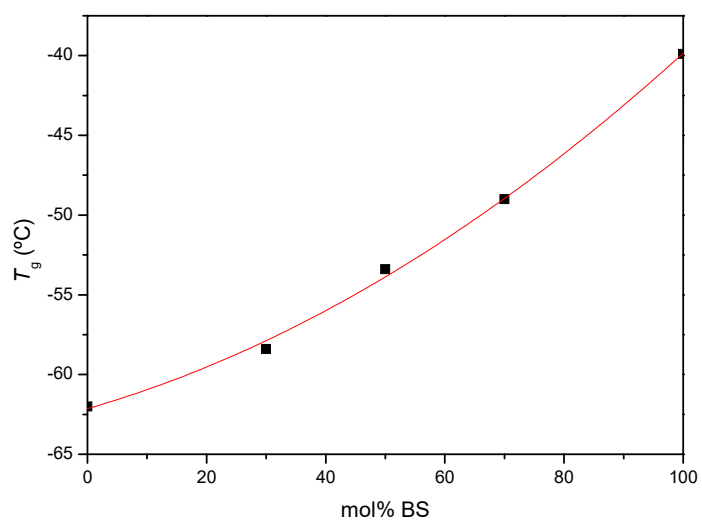

**Figure S6.** Evolution with composition of the glass transition ( $T_g$ ) of  $\text{PBS}_x\text{CL}_y$  copolyesters
